# Supplementary material
Source: publisher site journal article supplement (https://www.dovepress.com/article/541284)
Supplement: Supplementary file [file Supplementary%20material.pdf]

# Current attitudes and understanding on artificial intelligence of medical students in the United Kingdom

---

## Consent

*Thank you for taking part!*

*We are a group of researchers based at Guy's and St. Thomas' NHS Foundation Trust and Kings College London who are trying to better understand your views and experiences on this topic.*

*This survey will approximately 3mins to complete.*

*Your responses will be stored securely. Only named research team members will be able to view your responses.*

*We aim to present the aggregate results at an academic conference and an academic journal.*

*By completing the survey, you consent to the above.*

## **Which Medical School do you currently attend?**

- Aston Medical School
- Barts and The London School of Medicine and Dentistry
- University of Birmingham
- Bristol Medical School
- Brighton and Sussex Medical School
- University of Cambridge
- University of Central Lancashire
- University of Exeter
- Hull York Medical School
- Imperial College London
- Keele University
- Kings College London
- University of Lancaster
- University of Leeds
- University of Leicester
- University of Liverpool
- University of Manchester
- University of Newcastle
- University of Nottingham
- University of East Anglia
- University of Oxford
- Plymouth University
- University College London
- University of Sheffield
- University of Southampton
- St George's, University of London
- Warwick Medical School
- University of Aberdeen
- University of Dundee
- University of Edinburgh
- University of Glasgow
- University of St. Andrews
- University of Cardiff
- Swansea University
- Queens University Belfast

**Please rate your agreement to the follow questions:**

AI will play an important role in healthcare

- Strongly agree       Agree       Neither agree or disagree       Disagree       Strongly disagree

I am **LESS** likely to consider a career in radiology, given the advancement of AI

- Strongly agree       Agree       Neither agree or disagree       Disagree       Strongly disagree

Some specialties will be replaced by AI during my lifetime

- Strongly agree       Agree       Neither agree or disagree       Disagree       Strongly disagree

I have an understanding of the basic computational principles of AI

- Strongly agree       Agree       Neither agree or disagree       Disagree       Strongly disagree

I am comfortable with the nomenclature related to artificial intelligence

- Strongly agree       Agree       Neither agree or disagree       Disagree       Strongly disagree

I have an understanding of the limitations of artificial intelligence

- Strongly agree       Agree       Neither agree or disagree       Disagree       Strongly disagree

Teaching in artificial intelligence will be beneficial for my career

- Strongly agree       Agree       Neither agree or disagree       Disagree       Strongly disagree

All medical students should receive teaching in artificial intelligence

- Strongly agree       Agree       Neither agree or disagree       Disagree       Strongly disagree

At the end of my medical degree, I will be confident in using basic healthcare AI tools if required

- Strongly agree       Agree       Neither agree or disagree       Disagree       Strongly disagree

At the end of my medical degree, I will have a better understanding of the methods used to assess healthcare AI algorithm performance

- Strongly agree       Agree       Neither agree or disagree       Disagree       Strongly disagree

Overall, at the end of my medical degree, I feel I will possess the knowledge needed to work with AI in routine clinical practice

- Strongly agree       Agree       Neither agree or disagree       Disagree       Strongly disagree

**Please answer yes or no to the following questions:**

I have received teaching/training in artificial intelligence

- Yes  No

If you have answered yes to the previous question, was this teaching/training a compulsory part of your medical degree?

- Yes  No  N/A

**If you have received teaching/training in artificial intelligence, please rate the usefulness of the teaching/training you have received**

- Extremely useful  Very useful  Somewhat useful  Not so useful  Not at all useful
